# Supplementary material for: Effects of smoking on genome-wide DNA methylation profiles: A study of discordant and concordant monozygotic twin pairs
Source: eLife journal article supplement (doi:10.7554/elife.83286), 2023-08-10
Supplement: supp [file elife_poa_e83286_Figure_3_figure_supplement_1.docx]

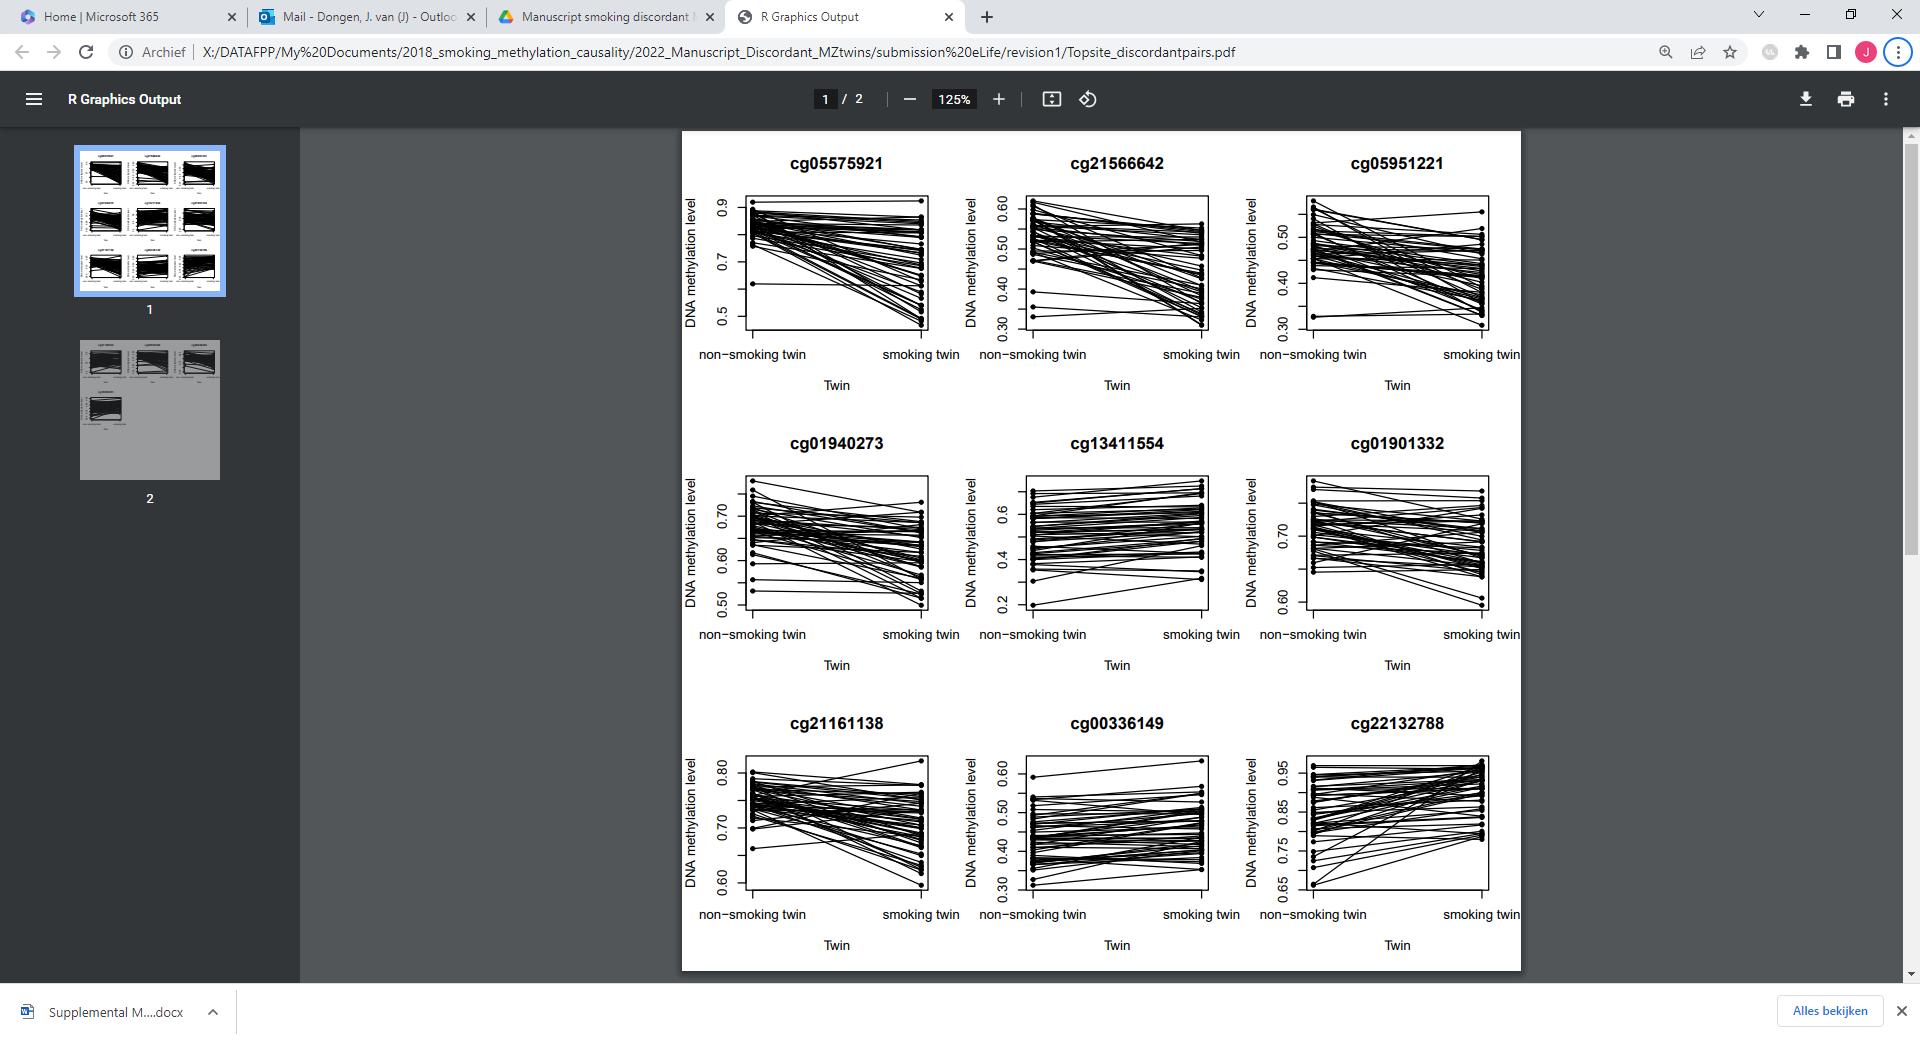


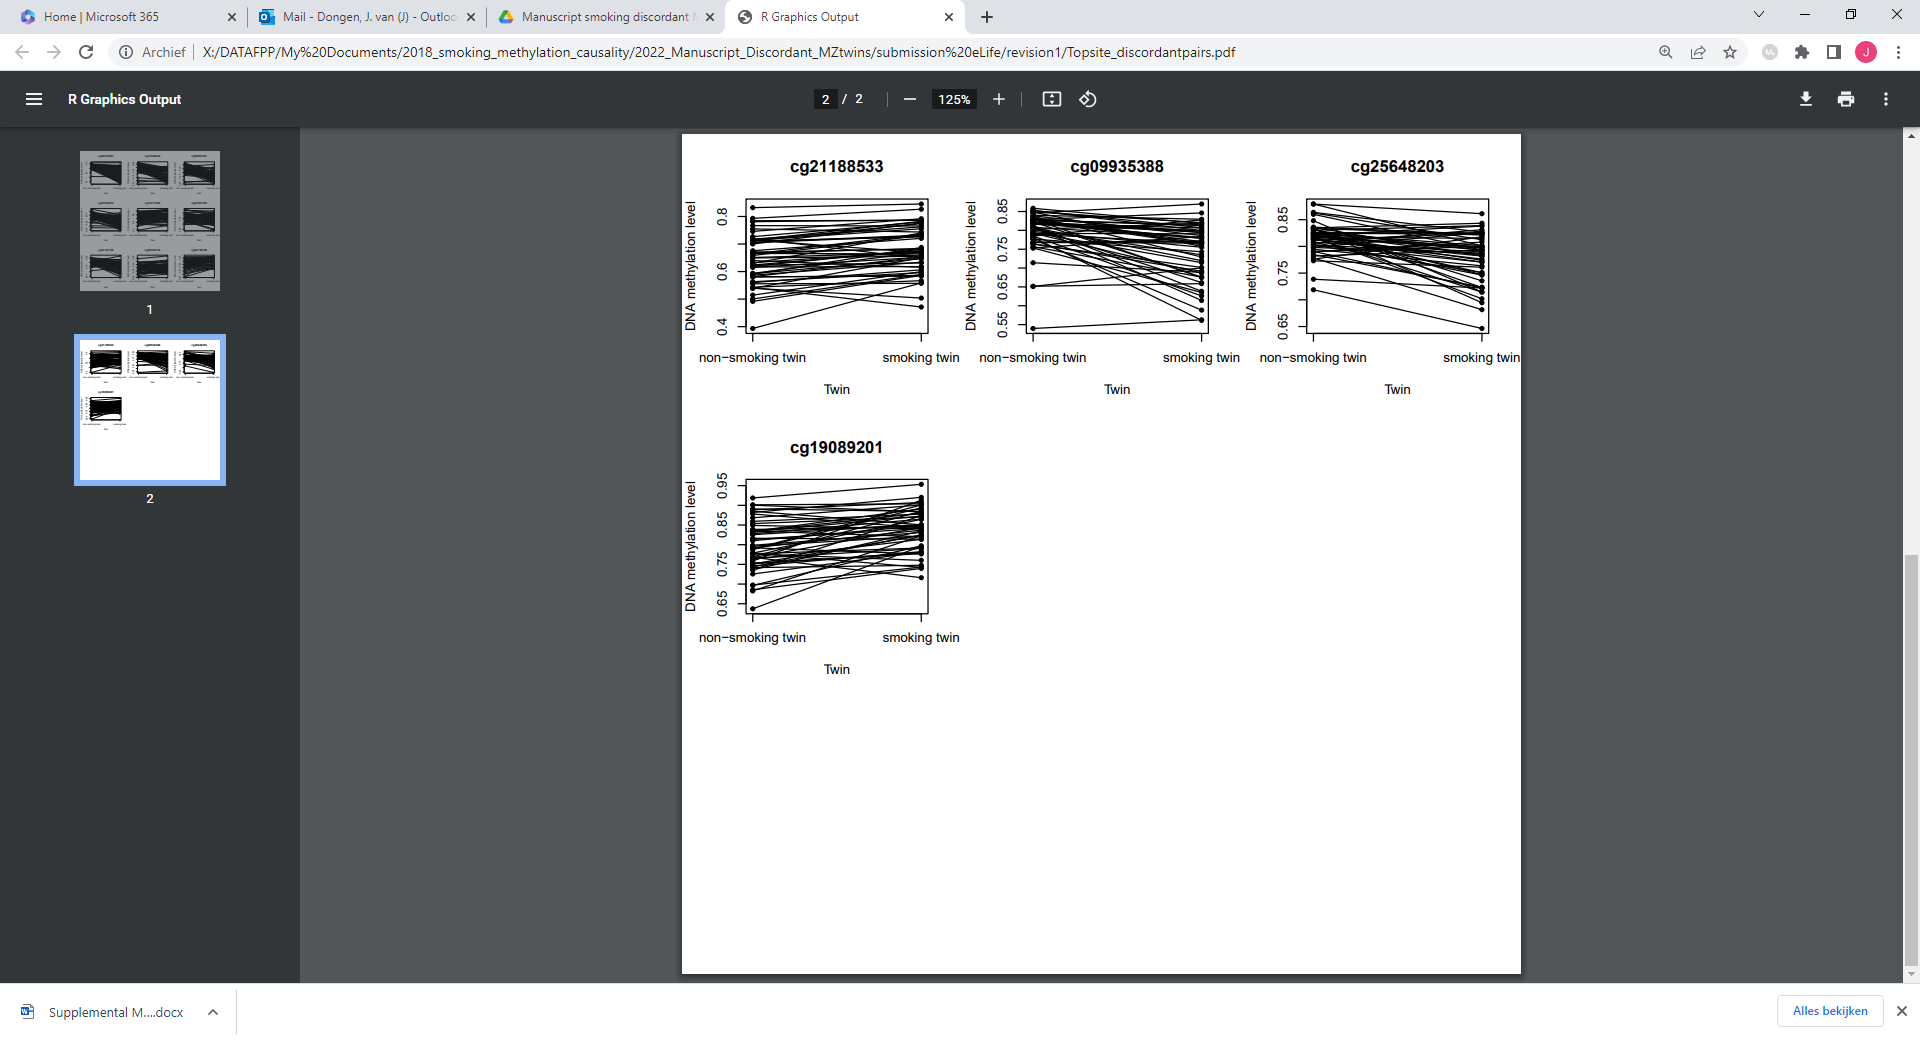


**Figure 3 -Figure supplement 1: DNA methylation levels in current/never smoking discordant monozygotic twin pairs.** Figures show the DNA methylation beta-values (unadjusted for any covariates) in 53 discordant monozygotic twin pairs for the 13 significant CpGs.
